# Supplementary material for: First record of the non-indigenous jellyfish Blackfordia virginica (Mayer, 1910) in the Baltic Sea
Source: Springer Nature journal article supplement (doi:10.1186/s10152-018-0513-7), 2018-08-01
Supplement: MOESM1 [file 10152_2018_513_MOESM1_ESM.xlsx]

## Sheet: Station_information_Baltic_Sea
Year	Month	Cruise (RV)	Station	Lat_decimal	Lon_decimal	Position N	Position E	Area	B. virginica presence (1)/absence (0)	Area abbreviations used
2008	8	R/V Alkor	01	55.458	14.75	55 27.5	14 45	BB	0	AB	Arkona Basin
2008	8	R/V Alkor	02	55.625	14.75	55 37.5	14 45	BB	0	BB	Bornholm Basin
2008	8	R/V Alkor	03	55.625	15	55 37.5	15 00	BB	0	GD	Gdansk Deep
2008	8	R/V Alkor	04	55.625	15.25	55 37.5	15 15	BB	0	GB	Gotland Basin
2008	8	R/V Alkor	05	55.625	15.5	55 37.5	15 30	BB	0	KB	Kiel Bight
2008	8	R/V Alkor	06	55.625	15.75	55 37.5	15 45	BB	0	SW	South-western Baltic Sea
2008	8	R/V Alkor	07	55.625	16	55 37.5	16 00	BB	0	WGB	Western Gotland Basin
2008	8	R/V Alkor	08	55.792	16	55 47.5	16 00	BB	0
2008	8	R/V Alkor	09	55.792	16.25	55 47.5	16 15	BB	0
2008	8	R/V Alkor	10	55.625	16.25	55 37.5	16 15	BB	0
2008	8	R/V Alkor	11	55.792	16.5	55 47.5	16 30	BB	0
2008	8	R/V Alkor	12	55.625	16.5	55 37.5	16 30	BB	0
2008	8	R/V Alkor	13	55.458	16.5	55 27.5	16 30	BB	0
2008	8	R/V Alkor	14	55.458	16.25	55 27.5	16 15	BB	0
2008	8	R/V Alkor	15	55.458	16	55 27.5	16 00	BB	0
2008	8	R/V Alkor	16	55.458	15.75	55 27.5	15 45	BB	0
2008	8	R/V Alkor	17	55.458	15.5	55 27.5	15 30	BB	0
2008	8	R/V Alkor	18	55.458	15.25	55 27.5	15 15	BB	0
2008	8	R/V Alkor	19	55.458	15	55 27.5	15 00	BB	0
2008	8	R/V Alkor	20	55.292	15	55 17.5	15 00	BB	0
2008	8	R/V Alkor	21	55.292	15.283	55 17.5	15 17	BB	0
2008	8	R/V Alkor	22	55.292	15.5	55 17.5	15 30	BB	0
2008	8	R/V Alkor	23	55.292	15.75	55 17.5	15 45	BB	0
2008	8	R/V Alkor	24	55.292	16	55 17.5	16 00	BB	0
2008	8	R/V Alkor	25	55.292	16.25	55 17.5	16 15	BB	0
2008	8	R/V Alkor	26	55.292	16.5	55 17.5	16 30	BB	0
2008	8	R/V Alkor	27	55.125	16.5	55 07.5	16 30	BB	0
2008	8	R/V Alkor	28	55.125	16.25	55 07.5	16 15	BB	0
2008	8	R/V Alkor	29	55.125	16	55 07.5	16 00	BB	0
2008	8	R/V Alkor	30	55.125	15.75	55 07.5	15 45	BB	0
2008	8	R/V Alkor	31	55.125	15.5	55 07.5	15 30	BB	0
2008	8	R/V Alkor	32	55.125	15.25	55 07.5	15 15	BB	0
2008	8	R/V Alkor	33	54.958	15.25	54 57.5	15 15	BB	0
2008	8	R/V Alkor	34	54.958	15.5	54 57.5	15 30	BB	0
2008	8	R/V Alkor	35	54.958	15.75	54 57.5	15 45	BB	0
2008	8	R/V Alkor	36	54.958	16	54 57.5	16 00	BB	0
2008	8	R/V Alkor	37	54.958	16.25	54 57.5	16 15	BB	0
2008	8	R/V Alkor	38	54.792	16	54 47.5	16 00	BB	0
2008	8	R/V Alkor	39	54.792	15.75	54 47.5	15 45	BB	0
2008	8	R/V Alkor	40	54.792	15.5	54 47.5	15 30	BB	0
2008	8	R/V Alkor	41	54.792	15.25	54 47.5	15 15	BB	0
2008	8	R/V Alkor	42	54.792	15	54 47.5	15 00	BB	0
2008	8	R/V Alkor	43	54.625	15.25	54 37.5	15 15	BB	0
2008	8	R/V Alkor	44	54.625	15.5	54 37.5	15 30	BB	0
2008	8	R/V Alkor	45	54.625	15.75	54 37.5	15 45	BB	0
2010	8	R/V Alkor	01	55.458	14.75	55 27.5	14 45	BB	0
2010	8	R/V Alkor	02	55.625	14.75	55 37.5	14 45	BB	0
2010	8	R/V Alkor	03	55.625	15	55 37.5	15 00	BB	0
2010	8	R/V Alkor	04	55.625	15.25	55 37.5	15 15	BB	0
2010	8	R/V Alkor	05	55.625	15.5	55 37.5	15 30	BB	0
2010	8	R/V Alkor	06	55.625	15.75	55 37.5	15 45	BB	0
2010	8	R/V Alkor	07	55.625	16	55 37.5	16 00	BB	0
2010	8	R/V Alkor	08	55.792	16	55 47.5	16 00	BB	0
2010	8	R/V Alkor	09	55.792	16.25	55 47.5	16 15	BB	0
2010	8	R/V Alkor	10	55.625	16.25	55 37.5	16 15	BB	0
2010	8	R/V Alkor	11	55.792	16.5	55 47.5	16 30	BB	0
2010	8	R/V Alkor	12	55.625	16.5	55 37.5	16 30	BB	0
2010	8	R/V Alkor	13	55.458	16.5	55 27.5	16 30	BB	0
2010	8	R/V Alkor	14	55.458	16.25	55 27.5	16 15	BB	0
2010	8	R/V Alkor	15	55.458	16	55 27.5	16 00	BB	0
2010	8	R/V Alkor	16	55.458	15.75	55 27.5	15 45	BB	0
2010	8	R/V Alkor	17	55.458	15.5	55 27.5	15 30	BB	0
2010	8	R/V Alkor	18	55.458	15.25	55 27.5	15 15	BB	0
2010	8	R/V Alkor	19	55.458	15	55 27.5	15 00	BB	0
2010	8	R/V Alkor	20	55.292	15	55 17.5	15 00	BB	0
2010	8	R/V Alkor	21	55.292	15.283	55 17.5	15 17	BB	0
2010	8	R/V Alkor	22	55.292	15.5	55 17.5	15 30	BB	0
2010	8	R/V Alkor	23	55.292	15.75	55 17.5	15 45	BB	0
2010	8	R/V Alkor	24	55.292	16	55 17.5	16 00	BB	0
2010	8	R/V Alkor	25	55.292	16.25	55 17.5	16 15	BB	0
2010	8	R/V Alkor	26	55.292	16.5	55 17.5	16 30	BB	0
2010	8	R/V Alkor	27	55.125	16.5	55 07.5	16 30	BB	0
2010	8	R/V Alkor	28	55.125	16.25	55 07.5	16 15	BB	0
2010	8	R/V Alkor	29	55.125	16	55 07.5	16 00	BB	0
2010	8	R/V Alkor	30	55.125	15.75	55 07.5	15 45	BB	0
2010	8	R/V Alkor	31	55.125	15.5	55 07.5	15 30	BB	0
2010	8	R/V Alkor	32	55.125	15.25	55 07.5	15 15	BB	0
2010	8	R/V Alkor	33	54.958	15.25	54 57.5	15 15	BB	0
2010	8	R/V Alkor	34	54.958	15.5	54 57.5	15 30	BB	0
2010	8	R/V Alkor	35	54.958	15.75	54 57.5	15 45	BB	0
2010	8	R/V Alkor	36	54.958	16	54 57.5	16 00	BB	0
2010	8	R/V Alkor	37	54.958	16.25	54 57.5	16 15	BB	0
2010	8	R/V Alkor	38	54.792	16	54 47.5	16 00	BB	0
2010	8	R/V Alkor	39	54.792	15.75	54 47.5	15 45	BB	0
2010	8	R/V Alkor	40	54.792	15.5	54 47.5	15 30	BB	0
2010	8	R/V Alkor	41	54.792	15.25	54 47.5	15 15	BB	0
2010	8	R/V Alkor	42	54.792	15	54 47.5	15 00	BB	0
2010	8	R/V Alkor	43	54.625	15.25	54 37.5	15 15	BB	0
2010	8	R/V Alkor	44	54.625	15.5	54 37.5	15 30	BB	0
2010	8	R/V Alkor	45	54.625	15.75	54 37.5	15 45	BB	0
2013	8	R/V Alkor	01	55.458	14.75	55 27.5	14 45	BB	0
2013	8	R/V Alkor	02	55.625	14.75	55 37.5	14 45	BB	0
2013	8	R/V Alkor	03	55.625	15	55 37.5	15 00	BB	0
2013	8	R/V Alkor	04	55.625	15.25	55 37.5	15 15	BB	0
2013	8	R/V Alkor	05	55.625	15.5	55 37.5	15 30	BB	0
2013	8	R/V Alkor	06	55.625	15.75	55 37.5	15 45	BB	0
2013	8	R/V Alkor	07	55.625	16	55 37.5	16 00	BB	0
2013	8	R/V Alkor	08	55.792	16	55 47.5	16 00	BB	0
2013	8	R/V Alkor	09	55.792	16.25	55 47.5	16 15	BB	0
2013	8	R/V Alkor	10	55.625	16.25	55 37.5	16 15	BB	0
2013	8	R/V Alkor	11	55.792	16.5	55 47.5	16 30	BB	0
2013	8	R/V Alkor	12	55.625	16.5	55 37.5	16 30	BB	0
2013	8	R/V Alkor	13	55.458	16.5	55 27.5	16 30	BB	0
2013	8	R/V Alkor	14	55.458	16.25	55 27.5	16 15	BB	0
2013	8	R/V Alkor	15	55.458	16	55 27.5	16 00	BB	0
2013	8	R/V Alkor	16	55.458	15.75	55 27.5	15 45	BB	0
2013	8	R/V Alkor	17	55.458	15.5	55 27.5	15 30	BB	0
2013	8	R/V Alkor	18	55.458	15.25	55 27.5	15 15	BB	0
2013	8	R/V Alkor	19	55.458	15	55 27.5	15 00	BB	0
2013	8	R/V Alkor	20	55.292	15	55 17.5	15 00	BB	0
2013	8	R/V Alkor	21	55.292	15.283	55 17.5	15 17	BB	0
2013	8	R/V Alkor	22	55.292	15.5	55 17.5	15 30	BB	0
2013	8	R/V Alkor	23	55.292	15.75	55 17.5	15 45	BB	0
2013	8	R/V Alkor	24	55.292	16	55 17.5	16 00	BB	0
2013	8	R/V Alkor	25	55.292	16.25	55 17.5	16 15	BB	0
2013	8	R/V Alkor	26	55.292	16.5	55 17.5	16 30	BB	0
2013	8	R/V Alkor	27	55.125	16.5	55 07.5	16 30	BB	0
2013	8	R/V Alkor	28	55.125	16.25	55 07.5	16 15	BB	0
2013	8	R/V Alkor	29	55.125	16	55 07.5	16 00	BB	0
2013	8	R/V Alkor	30	55.125	15.75	55 07.5	15 45	BB	0
2013	8	R/V Alkor	31	55.125	15.5	55 07.5	15 30	BB	0
2013	8	R/V Alkor	32	55.125	15.25	55 07.5	15 15	BB	0
2013	8	R/V Alkor	33	54.958	15.25	54 57.5	15 15	BB	0
2013	8	R/V Alkor	34	54.958	15.5	54 57.5	15 30	BB	0
2013	8	R/V Alkor	35	54.958	15.75	54 57.5	15 45	BB	0
2013	8	R/V Alkor	36	54.958	16	54 57.5	16 00	BB	0
2013	8	R/V Alkor	37	54.958	16.25	54 57.5	16 15	BB	0
2013	8	R/V Alkor	38	54.792	16	54 47.5	16 00	BB	0
2013	8	R/V Alkor	39	54.792	15.75	54 47.5	15 45	BB	0
2013	8	R/V Alkor	40	54.792	15.5	54 47.5	15 30	BB	0
2013	8	R/V Alkor	41	54.792	15.25	54 47.5	15 15	BB	0
2013	8	R/V Alkor	42	54.792	15	54 47.5	15 00	BB	0
2013	8	R/V Alkor	43	54.625	15.25	54 37.5	15 15	BB	0
2013	8	R/V Alkor	44	54.625	15.5	54 37.5	15 30	BB	0
2013	8	R/V Alkor	45	54.625	15.75	54 37.5	15 45	BB	0
2014	8	R/V Alkor	01	55.458	14.75	55 27.5	14 45	BB	0
2014	8	R/V Alkor	02	55.625	14.75	55 37.5	14 45	BB	0
2014	8	R/V Alkor	03	55.625	15	55 37.5	15 00	BB	0
2014	8	R/V Alkor	04	55.625	15.25	55 37.5	15 15	BB	0
2014	8	R/V Alkor	05	55.625	15.5	55 37.5	15 30	BB	0
2014	8	R/V Alkor	06	55.625	15.75	55 37.5	15 45	BB	0
2014	8	R/V Alkor	07	55.625	16	55 37.5	16 00	BB	0
2014	8	R/V Alkor	08	55.792	16	55 47.5	16 00	BB	0
2014	8	R/V Alkor	09	55.792	16.25	55 47.5	16 15	BB	0
2014	8	R/V Alkor	10	55.625	16.25	55 37.5	16 15	BB	0
2014	8	R/V Alkor	11	55.792	16.5	55 47.5	16 30	BB	0
2014	8	R/V Alkor	12	55.625	16.5	55 37.5	16 30	BB	0
2014	8	R/V Alkor	13	55.458	16.5	55 27.5	16 30	BB	0
2014	8	R/V Alkor	14	55.458	16.25	55 27.5	16 15	BB	0
2014	8	R/V Alkor	15	55.458	16	55 27.5	16 00	BB	0
2014	8	R/V Alkor	16	55.458	15.75	55 27.5	15 45	BB	0
2014	8	R/V Alkor	17	55.458	15.5	55 27.5	15 30	BB	0
2014	8	R/V Alkor	18	55.458	15.25	55 27.5	15 15	BB	0
2014	8	R/V Alkor	19	55.458	15	55 27.5	15 00	BB	0
2014	8	R/V Alkor	20	55.292	15	55 17.5	15 00	BB	0
2014	8	R/V Alkor	21	55.292	15.283	55 17.5	15 17	BB	0
2014	8	R/V Alkor	22	55.292	15.5	55 17.5	15 30	BB	0
2014	8	R/V Alkor	23	55.292	15.75	55 17.5	15 45	BB	0
2014	8	R/V Alkor	24	55.292	16	55 17.5	16 00	BB	0
2014	8	R/V Alkor	25	55.292	16.25	55 17.5	16 15	BB	0
2014	8	R/V Alkor	26	55.292	16.5	55 17.5	16 30	BB	0
2014	8	R/V Alkor	27	55.125	16.5	55 07.5	16 30	BB	0
2014	8	R/V Alkor	28	55.125	16.25	55 07.5	16 15	BB	0
2014	8	R/V Alkor	29	55.125	16	55 07.5	16 00	BB	0
2014	8	R/V Alkor	30	55.125	15.75	55 07.5	15 45	BB	0
2014	8	R/V Alkor	31	55.125	15.5	55 07.5	15 30	BB	0
2014	8	R/V Alkor	32	55.125	15.25	55 07.5	15 15	BB	0
2014	8	R/V Alkor	33	54.958	15.25	54 57.5	15 15	BB	0
2014	8	R/V Alkor	34	54.958	15.5	54 57.5	15 30	BB	0
2014	8	R/V Alkor	35	54.958	15.75	54 57.5	15 45	BB	0
2014	8	R/V Alkor	36	54.958	16	54 57.5	16 00	BB	0
2014	8	R/V Alkor	37	54.958	16.25	54 57.5	16 15	BB	0
2014	8	R/V Alkor	38	54.792	16	54 47.5	16 00	BB	0
2014	8	R/V Alkor	39	54.792	15.75	54 47.5	15 45	BB	0
2014	8	R/V Alkor	40	54.792	15.5	54 47.5	15 30	BB	0
2014	8	R/V Alkor	41	54.792	15.25	54 47.5	15 15	BB	0
2014	8	R/V Alkor	42	54.792	15	54 47.5	15 00	BB	0
2014	8	R/V Alkor	43	54.625	15.25	54 37.5	15 15	BB	0
2014	8	R/V Alkor	44	54.625	15.5	54 37.5	15 30	BB	0
2014	8	R/V Alkor	45	54.625	15.75	54 37.5	15 45	BB	0
2015	8	R/V Alkor	01	55.458	14.75	55 27.5	14 45	BB	0
2015	8	R/V Alkor	02	55.625	14.75	55 37.5	14 45	BB	0
2015	8	R/V Alkor	03	55.625	15	55 37.5	15 00	BB	0
2015	8	R/V Alkor	04	55.625	15.25	55 37.5	15 15	BB	0
2015	8	R/V Alkor	05	55.625	15.5	55 37.5	15 30	BB	0
2015	8	R/V Alkor	06	55.625	15.75	55 37.5	15 45	BB	0
2015	8	R/V Alkor	07	55.625	16	55 37.5	16 00	BB	0
2015	8	R/V Alkor	08	55.792	16	55 47.5	16 00	BB	0
2015	8	R/V Alkor	09	55.792	16.25	55 47.5	16 15	BB	0
2015	8	R/V Alkor	10	55.625	16.25	55 37.5	16 15	BB	0
2015	8	R/V Alkor	11	55.792	16.5	55 47.5	16 30	BB	0
2015	8	R/V Alkor	12	55.625	16.5	55 37.5	16 30	BB	0
2015	8	R/V Alkor	13	55.458	16.5	55 27.5	16 30	BB	0
2015	8	R/V Alkor	14	55.458	16.25	55 27.5	16 15	BB	0
2015	8	R/V Alkor	15	55.458	16	55 27.5	16 00	BB	0
2015	8	R/V Alkor	16	55.458	15.75	55 27.5	15 45	BB	0
2015	8	R/V Alkor	17	55.458	15.5	55 27.5	15 30	BB	0
2015	8	R/V Alkor	18	55.458	15.25	55 27.5	15 15	BB	0
2015	8	R/V Alkor	19	55.458	15	55 27.5	15 00	BB	0
2015	8	R/V Alkor	20	55.292	15	55 17.5	15 00	BB	0
2015	8	R/V Alkor	21	55.292	15.283	55 17.5	15 17	BB	0
2015	8	R/V Alkor	22	55.292	15.5	55 17.5	15 30	BB	0
2015	8	R/V Alkor	23	55.292	15.75	55 17.5	15 45	BB	0
2015	8	R/V Alkor	24	55.292	16	55 17.5	16 00	BB	0
2015	8	R/V Alkor	25	55.292	16.25	55 17.5	16 15	BB	0
2015	8	R/V Alkor	26	55.292	16.5	55 17.5	16 30	BB	0
2015	8	R/V Alkor	27	55.125	16.5	55 07.5	16 30	BB	0
2015	8	R/V Alkor	28	55.125	16.25	55 07.5	16 15	BB	0
2015	8	R/V Alkor	29	55.125	16	55 07.5	16 00	BB	0
2015	8	R/V Alkor	30	55.125	15.75	55 07.5	15 45	BB	0
2015	8	R/V Alkor	31	55.125	15.5	55 07.5	15 30	BB	0
2015	8	R/V Alkor	32	55.125	15.25	55 07.5	15 15	BB	0
2015	8	R/V Alkor	33	54.958	15.25	54 57.5	15 15	BB	0
2015	8	R/V Alkor	34	54.958	15.5	54 57.5	15 30	BB	0
2015	8	R/V Alkor	35	54.958	15.75	54 57.5	15 45	BB	0
2015	8	R/V Alkor	36	54.958	16	54 57.5	16 00	BB	0
2015	8	R/V Alkor	37	54.958	16.25	54 57.5	16 15	BB	0
2015	8	R/V Alkor	38	54.792	16	54 47.5	16 00	BB	0
2015	8	R/V Alkor	39	54.792	15.75	54 47.5	15 45	BB	0
2015	8	R/V Alkor	40	54.792	15.5	54 47.5	15 30	BB	0
2015	8	R/V Alkor	41	54.792	15.25	54 47.5	15 15	BB	0
2015	8	R/V Alkor	42	54.792	15	54 47.5	15 00	BB	0
2015	8	R/V Alkor	43	54.625	15.25	54 37.5	15 15	BB	0
2015	8	R/V Alkor	44	54.625	15.5	54 37.5	15 30	BB	0
2015	8	R/V Alkor	45	54.625	15.75	54 37.5	15 45	BB	0
2015	9	R/V Dana	01	55.458	14.75	55 27.5	14 45	BB	0
2015	9	R/V Dana	02	55.625	14.75	55 37.5	14 45	BB	0
2015	9	R/V Dana	03	55.625	15	55 37.5	15 00	BB	0
2015	9	R/V Dana	04	55.625	15.25	55 37.5	15 15	BB	0
2015	9	R/V Dana	05	55.625	15.5	55 37.5	15 30	BB	0
2015	9	R/V Dana	06	55.625	15.75	55 37.5	15 45	BB	0
2015	9	R/V Dana	07	55.625	16	55 37.5	16 00	BB	0
2015	9	R/V Dana	08	55.792	16	55 47.5	16 00	BB	0
2015	9	R/V Dana	09	55.792	16.25	55 47.5	16 15	BB	0
2015	9	R/V Dana	10	55.625	16.25	55 37.5	16 15	BB	0
2015	9	R/V Dana	11	55.792	16.5	55 47.5	16 30	BB	0
2015	9	R/V Dana	12	55.625	16.5	55 37.5	16 30	BB	0
2015	9	R/V Dana	13	55.458	16.5	55 27.5	16 30	BB	0
2015	9	R/V Dana	14	55.458	16.25	55 27.5	16 15	BB	0
2015	9	R/V Dana	15	55.458	16	55 27.5	16 00	BB	0
2015	9	R/V Dana	16	55.458	15.75	55 27.5	15 45	BB	0
2015	9	R/V Dana	17	55.458	15.5	55 27.5	15 30	BB	0
2015	9	R/V Dana	18	55.458	15.25	55 27.5	15 15	BB	0
2015	9	R/V Dana	19	55.458	15	55 27.5	15 00	BB	0
2015	9	R/V Dana	20	55.292	15	55 17.5	15 00	BB	0
2015	9	R/V Dana	21	55.292	15.283	55 17.5	15 17	BB	0
2015	9	R/V Dana	22	55.292	15.5	55 17.5	15 30	BB	0
2015	9	R/V Dana	23	55.292	15.75	55 17.5	15 45	BB	0
2015	9	R/V Dana	24	55.292	16	55 17.5	16 00	BB	0
2015	9	R/V Dana	25	55.292	16.25	55 17.5	16 15	BB	0
2015	9	R/V Dana	26	55.292	16.5	55 17.5	16 30	BB	0
2015	9	R/V Dana	27	55.125	16.5	55 07.5	16 30	BB	0
2015	9	R/V Dana	28	55.125	16.25	55 07.5	16 15	BB	0
2015	9	R/V Dana	29	55.125	16	55 07.5	16 00	BB	0
2015	9	R/V Dana	30	55.125	15.75	55 07.5	15 45	BB	0
2015	9	R/V Dana	31	55.125	15.5	55 07.5	15 30	BB	0
2015	9	R/V Dana	32	55.125	15.25	55 07.5	15 15	BB	0
2015	9	R/V Dana	33	54.958	15.25	54 57.5	15 15	BB	0
2015	9	R/V Dana	34	54.958	15.5	54 57.5	15 30	BB	0
2015	9	R/V Dana	35	54.958	15.75	54 57.5	15 45	BB	0
2015	9	R/V Dana	36	54.958	16	54 57.5	16 00	BB	0
2015	9	R/V Dana	37	54.958	16.25	54 57.5	16 15	BB	0
2015	9	R/V Dana	38	54.792	16	54 47.5	16 00	BB	0
2015	9	R/V Dana	39	54.792	15.75	54 47.5	15 45	BB	0
2015	9	R/V Dana	40	54.792	15.5	54 47.5	15 30	BB	0
2015	9	R/V Dana	41	54.792	15.25	54 47.5	15 15	BB	0
2015	9	R/V Dana	42	54.792	15	54 47.5	15 00	BB	0
2015	9	R/V Dana	43	54.625	15.25	54 37.5	15 15	BB	0
2015	9	R/V Dana	44	54.625	15.5	54 37.5	15 30	BB	0
2015	9	R/V Dana	45	54.625	15.75	54 37.5	15 45	BB	0
2010	6	R/V Baltica	01	55.458	14.75	55 27.5	14 45	BB	0
2010	6	R/V Baltica	02	55.625	14.75	55 37.5	14 45	BB	0
2010	6	R/V Baltica	03	55.625	15	55 37.5	15 00	BB	0
2010	6	R/V Baltica	04	55.625	15.25	55 37.5	15 15	BB	0
2010	6	R/V Baltica	05	55.625	15.5	55 37.5	15 30	BB	0
2010	6	R/V Baltica	06	55.625	15.75	55 37.5	15 45	BB	0
2010	6	R/V Baltica	07	55.625	16	55 37.5	16 00	BB	0
2010	6	R/V Baltica	08	55.792	16	55 47.5	16 00	BB	0
2010	6	R/V Baltica	09	55.792	16.25	55 47.5	16 15	BB	0
2010	6	R/V Baltica	10	55.625	16.25	55 37.5	16 15	BB	0
2010	6	R/V Baltica	11	55.792	16.5	55 47.5	16 30	BB	0
2010	6	R/V Baltica	12	55.625	16.5	55 37.5	16 30	BB	0
2010	6	R/V Baltica	13	55.458	16.5	55 27.5	16 30	BB	0
2010	6	R/V Baltica	14	55.458	16.25	55 27.5	16 15	BB	0
2010	6	R/V Baltica	15	55.458	16	55 27.5	16 00	BB	0
2010	6	R/V Baltica	16	55.458	15.75	55 27.5	15 45	BB	0
2010	6	R/V Baltica	17	55.458	15.5	55 27.5	15 30	BB	0
2010	6	R/V Baltica	18	55.458	15.25	55 27.5	15 15	BB	0
2010	6	R/V Baltica	19	55.458	15	55 27.5	15 00	BB	0
2010	6	R/V Baltica	20	55.292	15	55 17.5	15 00	BB	0
2010	6	R/V Baltica	21	55.292	15.283	55 17.5	15 17	BB	0
2010	6	R/V Baltica	22	55.292	15.5	55 17.5	15 30	BB	0
2010	6	R/V Baltica	23	55.292	15.75	55 17.5	15 45	BB	0
2010	6	R/V Baltica	24	55.292	16	55 17.5	16 00	BB	0
2010	6	R/V Baltica	25	55.292	16.25	55 17.5	16 15	BB	0
2010	6	R/V Baltica	26	55.292	16.5	55 17.5	16 30	BB	0
2010	6	R/V Baltica	27	55.125	16.5	55 07.5	16 30	BB	0
2010	6	R/V Baltica	28	55.125	16.25	55 07.5	16 15	BB	0
2010	6	R/V Baltica	29	55.125	16	55 07.5	16 00	BB	0
2010	6	R/V Baltica	30	55.125	15.75	55 07.5	15 45	BB	0
2010	6	R/V Baltica	31	55.125	15.5	55 07.5	15 30	BB	0
2010	6	R/V Baltica	32	55.125	15.25	55 07.5	15 15	BB	0
2010	6	R/V Baltica	33	54.958	15.25	54 57.5	15 15	BB	0
2010	6	R/V Baltica	34	54.958	15.5	54 57.5	15 30	BB	0
2010	6	R/V Baltica	35	54.958	15.75	54 57.5	15 45	BB	0
2010	6	R/V Baltica	36	54.958	16	54 57.5	16 00	BB	0
2010	6	R/V Baltica	37	54.958	16.25	54 57.5	16 15	BB	0
2010	6	R/V Baltica	38	54.792	16	54 47.5	16 00	BB	0
2010	6	R/V Baltica	39	54.792	15.75	54 47.5	15 45	BB	0
2010	6	R/V Baltica	40	54.792	15.5	54 47.5	15 30	BB	0
2010	6	R/V Baltica	41	54.792	15.25	54 47.5	15 15	BB	0
2010	6	R/V Baltica	42	54.792	15	54 47.5	15 00	BB	0
2010	6	R/V Baltica	43	54.625	15.25	54 37.5	15 15	BB	0
2010	6	R/V Baltica	44	54.625	15.5	54 37.5	15 30	BB	0
2010	6	R/V Baltica	45	54.625	15.75	54 37.5	15 45	BB	0
2011	6	R/V Baltica	01	55.458	14.75	55 27.5	14 45	BB	0
2011	6	R/V Baltica	02	55.625	14.75	55 37.5	14 45	BB	0
2011	6	R/V Baltica	03	55.625	15	55 37.5	15 00	BB	0
2011	6	R/V Baltica	04	55.625	15.25	55 37.5	15 15	BB	0
2011	6	R/V Baltica	05	55.625	15.5	55 37.5	15 30	BB	0
2011	6	R/V Baltica	06	55.625	15.75	55 37.5	15 45	BB	0
2011	6	R/V Baltica	07	55.625	16	55 37.5	16 00	BB	0
2011	6	R/V Baltica	08	55.792	16	55 47.5	16 00	BB	0
2011	6	R/V Baltica	09	55.792	16.25	55 47.5	16 15	BB	0
2011	6	R/V Baltica	10	55.625	16.25	55 37.5	16 15	BB	0
2011	6	R/V Baltica	11	55.792	16.5	55 47.5	16 30	BB	0
2011	6	R/V Baltica	12	55.625	16.5	55 37.5	16 30	BB	0
2011	6	R/V Baltica	13	55.458	16.5	55 27.5	16 30	BB	0
2011	6	R/V Baltica	14	55.458	16.25	55 27.5	16 15	BB	0
2011	6	R/V Baltica	15	55.458	16	55 27.5	16 00	BB	0
2011	6	R/V Baltica	16	55.458	15.75	55 27.5	15 45	BB	0
2011	6	R/V Baltica	17	55.458	15.5	55 27.5	15 30	BB	0
2011	6	R/V Baltica	18	55.458	15.25	55 27.5	15 15	BB	0
2011	6	R/V Baltica	19	55.458	15	55 27.5	15 00	BB	0
2011	6	R/V Baltica	20	55.292	15	55 17.5	15 00	BB	0
2011	6	R/V Baltica	21	55.292	15.283	55 17.5	15 17	BB	0
2011	6	R/V Baltica	22	55.292	15.5	55 17.5	15 30	BB	0
2011	6	R/V Baltica	23	55.292	15.75	55 17.5	15 45	BB	0
2011	6	R/V Baltica	24	55.292	16	55 17.5	16 00	BB	0
2011	6	R/V Baltica	25	55.292	16.25	55 17.5	16 15	BB	0
2011	6	R/V Baltica	26	55.292	16.5	55 17.5	16 30	BB	0
2011	6	R/V Baltica	27	55.125	16.5	55 07.5	16 30	BB	0
2011	6	R/V Baltica	28	55.125	16.25	55 07.5	16 15	BB	0
2011	6	R/V Baltica	29	55.125	16	55 07.5	16 00	BB	0
2011	6	R/V Baltica	30	55.125	15.75	55 07.5	15 45	BB	0
2011	6	R/V Baltica	31	55.125	15.5	55 07.5	15 30	BB	0
2011	6	R/V Baltica	32	55.125	15.25	55 07.5	15 15	BB	0
2011	6	R/V Baltica	33	54.958	15.25	54 57.5	15 15	BB	0
2011	6	R/V Baltica	34	54.958	15.5	54 57.5	15 30	BB	0
2011	6	R/V Baltica	35	54.958	15.75	54 57.5	15 45	BB	0
2011	6	R/V Baltica	36	54.958	16	54 57.5	16 00	BB	0
2011	6	R/V Baltica	37	54.958	16.25	54 57.5	16 15	BB	0
2011	6	R/V Baltica	38	54.792	16	54 47.5	16 00	BB	0
2011	6	R/V Baltica	39	54.792	15.75	54 47.5	15 45	BB	0
2011	6	R/V Baltica	40	54.792	15.5	54 47.5	15 30	BB	0
2011	6	R/V Baltica	41	54.792	15.25	54 47.5	15 15	BB	0
2011	6	R/V Baltica	42	54.792	15	54 47.5	15 00	BB	0
2011	6	R/V Baltica	43	54.625	15.25	54 37.5	15 15	BB	0
2011	6	R/V Baltica	44	54.625	15.5	54 37.5	15 30	BB	0
2011	6	R/V Baltica	45	54.625	15.75	54 37.5	15 45	BB	0
2012	6	R/V Baltica	01	55.458	14.75	55 27.5	14 45	BB	0
2012	6	R/V Baltica	02	55.625	14.75	55 37.5	14 45	BB	0
2012	6	R/V Baltica	03	55.625	15	55 37.5	15 00	BB	0
2012	6	R/V Baltica	04	55.625	15.25	55 37.5	15 15	BB	0
2012	6	R/V Baltica	05	55.625	15.5	55 37.5	15 30	BB	0
2012	6	R/V Baltica	06	55.625	15.75	55 37.5	15 45	BB	0
2012	6	R/V Baltica	07	55.625	16	55 37.5	16 00	BB	0
2012	6	R/V Baltica	08	55.792	16	55 47.5	16 00	BB	0
2012	6	R/V Baltica	09	55.792	16.25	55 47.5	16 15	BB	0
2012	6	R/V Baltica	10	55.625	16.25	55 37.5	16 15	BB	0
2012	6	R/V Baltica	11	55.792	16.5	55 47.5	16 30	BB	0
2012	6	R/V Baltica	12	55.625	16.5	55 37.5	16 30	BB	0
2012	6	R/V Baltica	13	55.458	16.5	55 27.5	16 30	BB	0
2012	6	R/V Baltica	14	55.458	16.25	55 27.5	16 15	BB	0
2012	6	R/V Baltica	15	55.458	16	55 27.5	16 00	BB	0
2012	6	R/V Baltica	16	55.458	15.75	55 27.5	15 45	BB	0
2012	6	R/V Baltica	17	55.458	15.5	55 27.5	15 30	BB	0
2012	6	R/V Baltica	18	55.458	15.25	55 27.5	15 15	BB	0
2012	6	R/V Baltica	19	55.458	15	55 27.5	15 00	BB	0
2012	6	R/V Baltica	20	55.292	15	55 17.5	15 00	BB	0
2012	6	R/V Baltica	21	55.292	15.283	55 17.5	15 17	BB	0
2012	6	R/V Baltica	22	55.292	15.5	55 17.5	15 30	BB	0
2012	6	R/V Baltica	23	55.292	15.75	55 17.5	15 45	BB	0
2012	6	R/V Baltica	24	55.292	16	55 17.5	16 00	BB	0
2012	6	R/V Baltica	25	55.292	16.25	55 17.5	16 15	BB	0
2012	6	R/V Baltica	26	55.292	16.5	55 17.5	16 30	BB	0
2012	6	R/V Baltica	27	55.125	16.5	55 07.5	16 30	BB	0
2012	6	R/V Baltica	28	55.125	16.25	55 07.5	16 15	BB	0
2012	6	R/V Baltica	29	55.125	16	55 07.5	16 00	BB	0
2012	6	R/V Baltica	30	55.125	15.75	55 07.5	15 45	BB	0
2012	6	R/V Baltica	31	55.125	15.5	55 07.5	15 30	BB	0
2012	6	R/V Baltica	32	55.125	15.25	55 07.5	15 15	BB	0
2012	6	R/V Baltica	33	54.958	15.25	54 57.5	15 15	BB	0
2012	6	R/V Baltica	34	54.958	15.5	54 57.5	15 30	BB	0
2012	6	R/V Baltica	35	54.958	15.75	54 57.5	15 45	BB	0
2012	6	R/V Baltica	36	54.958	16	54 57.5	16 00	BB	0
2012	6	R/V Baltica	37	54.958	16.25	54 57.5	16 15	BB	0
2012	6	R/V Baltica	38	54.792	16	54 47.5	16 00	BB	0
2012	6	R/V Baltica	39	54.792	15.75	54 47.5	15 45	BB	0
2012	6	R/V Baltica	40	54.792	15.5	54 47.5	15 30	BB	0
2012	6	R/V Baltica	41	54.792	15.25	54 47.5	15 15	BB	0
2012	6	R/V Baltica	42	54.792	15	54 47.5	15 00	BB	0
2012	6	R/V Baltica	43	54.625	15.25	54 37.5	15 15	BB	0
2012	6	R/V Baltica	44	54.625	15.5	54 37.5	15 30	BB	0
2012	6	R/V Baltica	45	54.625	15.75	54 37.5	15 45	BB	0
2014	6	R/V Baltica	01	55.458	14.75	55 27.5	14 45	BB	0
2014	6	R/V Baltica	02	55.625	14.75	55 37.5	14 45	BB	0
2014	6	R/V Baltica	03	55.625	15	55 37.5	15 00	BB	0
2014	6	R/V Baltica	04	55.625	15.25	55 37.5	15 15	BB	0
2014	6	R/V Baltica	05	55.625	15.5	55 37.5	15 30	BB	0
2014	6	R/V Baltica	06	55.625	15.75	55 37.5	15 45	BB	0
2014	6	R/V Baltica	07	55.625	16	55 37.5	16 00	BB	0
2014	6	R/V Baltica	08	55.792	16	55 47.5	16 00	BB	0
2014	6	R/V Baltica	09	55.792	16.25	55 47.5	16 15	BB	0
2014	6	R/V Baltica	10	55.625	16.25	55 37.5	16 15	BB	0
2014	6	R/V Baltica	11	55.792	16.5	55 47.5	16 30	BB	0
2014	6	R/V Baltica	12	55.625	16.5	55 37.5	16 30	BB	0
2014	6	R/V Baltica	13	55.458	16.5	55 27.5	16 30	BB	0
2014	6	R/V Baltica	14	55.458	16.25	55 27.5	16 15	BB	0
2014	6	R/V Baltica	15	55.458	16	55 27.5	16 00	BB	0
2014	6	R/V Baltica	16	55.458	15.75	55 27.5	15 45	BB	0
2014	6	R/V Baltica	17	55.458	15.5	55 27.5	15 30	BB	0
2014	6	R/V Baltica	18	55.458	15.25	55 27.5	15 15	BB	0
2014	6	R/V Baltica	19	55.458	15	55 27.5	15 00	BB	0
2014	6	R/V Baltica	20	55.292	15	55 17.5	15 00	BB	0
2014	6	R/V Baltica	21	55.292	15.283	55 17.5	15 17	BB	0
2014	6	R/V Baltica	22	55.292	15.5	55 17.5	15 30	BB	0
2014	6	R/V Baltica	23	55.292	15.75	55 17.5	15 45	BB	0
2014	6	R/V Baltica	24	55.292	16	55 17.5	16 00	BB	0
2014	6	R/V Baltica	25	55.292	16.25	55 17.5	16 15	BB	0
2014	6	R/V Baltica	26	55.292	16.5	55 17.5	16 30	BB	0
2014	6	R/V Baltica	27	55.125	16.5	55 07.5	16 30	BB	0
2014	6	R/V Baltica	28	55.125	16.25	55 07.5	16 15	BB	0
2014	6	R/V Baltica	29	55.125	16	55 07.5	16 00	BB	0
2014	6	R/V Baltica	30	55.125	15.75	55 07.5	15 45	BB	0
2014	6	R/V Baltica	31	55.125	15.5	55 07.5	15 30	BB	0
2014	6	R/V Baltica	32	55.125	15.25	55 07.5	15 15	BB	0
2014	6	R/V Baltica	33	54.958	15.25	54 57.5	15 15	BB	0
2014	6	R/V Baltica	34	54.958	15.5	54 57.5	15 30	BB	0
2014	6	R/V Baltica	35	54.958	15.75	54 57.5	15 45	BB	0
2014	6	R/V Baltica	36	54.958	16	54 57.5	16 00	BB	0
2014	6	R/V Baltica	37	54.958	16.25	54 57.5	16 15	BB	0
2014	6	R/V Baltica	38	54.792	16	54 47.5	16 00	BB	0
2014	6	R/V Baltica	39	54.792	15.75	54 47.5	15 45	BB	0
2014	6	R/V Baltica	40	54.792	15.5	54 47.5	15 30	BB	0
2014	6	R/V Baltica	41	54.792	15.25	54 47.5	15 15	BB	0
2014	6	R/V Baltica	42	54.792	15	54 47.5	15 00	BB	0
2014	6	R/V Baltica	43	54.625	15.25	54 37.5	15 15	BB	0
2014	6	R/V Baltica	44	54.625	15.5	54 37.5	15 30	BB	0
2014	6	R/V Baltica	45	54.625	15.75	54 37.5	15 45	BB	0
2015	6	R/V Baltica	01	55.458	14.75	55 27.5	14 45	BB	0
2015	6	R/V Baltica	02	55.625	14.75	55 37.5	14 45	BB	0
2015	6	R/V Baltica	03	55.625	15	55 37.5	15 00	BB	0
2015	6	R/V Baltica	04	55.625	15.25	55 37.5	15 15	BB	0
2015	6	R/V Baltica	05	55.625	15.5	55 37.5	15 30	BB	0
2015	6	R/V Baltica	06	55.625	15.75	55 37.5	15 45	BB	0
2015	6	R/V Baltica	07	55.625	16	55 37.5	16 00	BB	0
2015	6	R/V Baltica	08	55.792	16	55 47.5	16 00	BB	0
2015	6	R/V Baltica	09	55.792	16.25	55 47.5	16 15	BB	0
2015	6	R/V Baltica	10	55.625	16.25	55 37.5	16 15	BB	0
2015	6	R/V Baltica	11	55.792	16.5	55 47.5	16 30	BB	0
2015	6	R/V Baltica	12	55.625	16.5	55 37.5	16 30	BB	0
2015	6	R/V Baltica	13	55.458	16.5	55 27.5	16 30	BB	0
2015	6	R/V Baltica	14	55.458	16.25	55 27.5	16 15	BB	0
2015	6	R/V Baltica	15	55.458	16	55 27.5	16 00	BB	0
2015	6	R/V Baltica	16	55.458	15.75	55 27.5	15 45	BB	0
2015	6	R/V Baltica	17	55.458	15.5	55 27.5	15 30	BB	0
2015	6	R/V Baltica	18	55.458	15.25	55 27.5	15 15	BB	0
2015	6	R/V Baltica	19	55.458	15	55 27.5	15 00	BB	0
2015	6	R/V Baltica	20	55.292	15	55 17.5	15 00	BB	0
2015	6	R/V Baltica	21	55.292	15.283	55 17.5	15 17	BB	0
2015	6	R/V Baltica	22	55.292	15.5	55 17.5	15 30	BB	0
2015	6	R/V Baltica	23	55.292	15.75	55 17.5	15 45	BB	0
2015	6	R/V Baltica	24	55.292	16	55 17.5	16 00	BB	0
2015	6	R/V Baltica	25	55.292	16.25	55 17.5	16 15	BB	0
2015	6	R/V Baltica	26	55.292	16.5	55 17.5	16 30	BB	0
2015	6	R/V Baltica	27	55.125	16.5	55 07.5	16 30	BB	0
2015	6	R/V Baltica	28	55.125	16.25	55 07.5	16 15	BB	0
2015	6	R/V Baltica	29	55.125	16	55 07.5	16 00	BB	0
2015	6	R/V Baltica	30	55.125	15.75	55 07.5	15 45	BB	0
2015	6	R/V Baltica	31	55.125	15.5	55 07.5	15 30	BB	0
2015	6	R/V Baltica	32	55.125	15.25	55 07.5	15 15	BB	0
2015	6	R/V Baltica	33	54.958	15.25	54 57.5	15 15	BB	0
2015	6	R/V Baltica	34	54.958	15.5	54 57.5	15 30	BB	0
2015	6	R/V Baltica	35	54.958	15.75	54 57.5	15 45	BB	0
2015	6	R/V Baltica	36	54.958	16	54 57.5	16 00	BB	0
2015	6	R/V Baltica	37	54.958	16.25	54 57.5	16 15	BB	0
2015	6	R/V Baltica	38	54.792	16	54 47.5	16 00	BB	0
2015	6	R/V Baltica	39	54.792	15.75	54 47.5	15 45	BB	0
2015	6	R/V Baltica	40	54.792	15.5	54 47.5	15 30	BB	0
2015	6	R/V Baltica	41	54.792	15.25	54 47.5	15 15	BB	0
2015	6	R/V Baltica	42	54.792	15	54 47.5	15 00	BB	0
2015	6	R/V Baltica	43	54.625	15.25	54 37.5	15 15	BB	0
2015	6	R/V Baltica	44	54.625	15.5	54 37.5	15 30	BB	0
2015	6	R/V Baltica	45	54.625	15.75	54 37.5	15 45	BB	0
2016	6	R/V Baltica	01	55.458	14.75	55 27.5	14 45	BB	0
2016	6	R/V Baltica	02	55.625	14.75	55 37.5	14 45	BB	0
2016	6	R/V Baltica	03	55.625	15	55 37.5	15 00	BB	0
2016	6	R/V Baltica	04	55.625	15.25	55 37.5	15 15	BB	0
2016	6	R/V Baltica	05	55.625	15.5	55 37.5	15 30	BB	0
2016	6	R/V Baltica	06	55.625	15.75	55 37.5	15 45	BB	0
2016	6	R/V Baltica	07	55.625	16	55 37.5	16 00	BB	0
2016	6	R/V Baltica	08	55.792	16	55 47.5	16 00	BB	0
2016	6	R/V Baltica	09	55.792	16.25	55 47.5	16 15	BB	0
2016	6	R/V Baltica	10	55.625	16.25	55 37.5	16 15	BB	0
2016	6	R/V Baltica	11	55.792	16.5	55 47.5	16 30	BB	0
2016	6	R/V Baltica	12	55.625	16.5	55 37.5	16 30	BB	0
2016	6	R/V Baltica	13	55.458	16.5	55 27.5	16 30	BB	0
2016	6	R/V Baltica	14	55.458	16.25	55 27.5	16 15	BB	0
2016	6	R/V Baltica	15	55.458	16	55 27.5	16 00	BB	0
2016	6	R/V Baltica	16	55.458	15.75	55 27.5	15 45	BB	0
2016	6	R/V Baltica	17	55.458	15.5	55 27.5	15 30	BB	0
2016	6	R/V Baltica	18	55.458	15.25	55 27.5	15 15	BB	0
2016	6	R/V Baltica	19	55.458	15	55 27.5	15 00	BB	0
2016	6	R/V Baltica	20	55.292	15	55 17.5	15 00	BB	0
2016	6	R/V Baltica	21	55.292	15.283	55 17.5	15 17	BB	0
2016	6	R/V Baltica	22	55.292	15.5	55 17.5	15 30	BB	0
2016	6	R/V Baltica	23	55.292	15.75	55 17.5	15 45	BB	0
2016	6	R/V Baltica	24	55.292	16	55 17.5	16 00	BB	0
2016	6	R/V Baltica	25	55.292	16.25	55 17.5	16 15	BB	0
2016	6	R/V Baltica	26	55.292	16.5	55 17.5	16 30	BB	0
2016	6	R/V Baltica	27	55.125	16.5	55 07.5	16 30	BB	0
2016	6	R/V Baltica	28	55.125	16.25	55 07.5	16 15	BB	0
2016	6	R/V Baltica	29	55.125	16	55 07.5	16 00	BB	0
2016	6	R/V Baltica	30	55.125	15.75	55 07.5	15 45	BB	0
2016	6	R/V Baltica	31	55.125	15.5	55 07.5	15 30	BB	0
2016	6	R/V Baltica	32	55.125	15.25	55 07.5	15 15	BB	0
2016	6	R/V Baltica	33	54.958	15.25	54 57.5	15 15	BB	0
2016	6	R/V Baltica	34	54.958	15.5	54 57.5	15 30	BB	0
2016	6	R/V Baltica	35	54.958	15.75	54 57.5	15 45	BB	0
2016	6	R/V Baltica	36	54.958	16	54 57.5	16 00	BB	0
2016	6	R/V Baltica	37	54.958	16.25	54 57.5	16 15	BB	0
2016	6	R/V Baltica	38	54.792	16	54 47.5	16 00	BB	0
2016	6	R/V Baltica	39	54.792	15.75	54 47.5	15 45	BB	0
2016	6	R/V Baltica	40	54.792	15.5	54 47.5	15 30	BB	0
2016	6	R/V Baltica	41	54.792	15.25	54 47.5	15 15	BB	0
2016	6	R/V Baltica	42	54.792	15	54 47.5	15 00	BB	0
2016	6	R/V Baltica	43	54.625	15.25	54 37.5	15 15	BB	0
2016	6	R/V Baltica	44	54.625	15.5	54 37.5	15 30	BB	0
2016	6	R/V Baltica	45	54.625	15.75	54 37.5	15 45	BB	0
2017	6	R/V Baltica	01	55.458	14.75	55 27.5	14 45	BB	0
2017	6	R/V Baltica	02	55.625	14.75	55 37.5	14 45	BB	0
2017	6	R/V Baltica	03	55.625	15	55 37.5	15 00	BB	0
2017	6	R/V Baltica	04	55.625	15.25	55 37.5	15 15	BB	0
2017	6	R/V Baltica	05	55.625	15.5	55 37.5	15 30	BB	0
2017	6	R/V Baltica	06	55.625	15.75	55 37.5	15 45	BB	0
2017	6	R/V Baltica	07	55.625	16	55 37.5	16 00	BB	0
2017	6	R/V Baltica	08	55.792	16	55 47.5	16 00	BB	0
2017	6	R/V Baltica	09	55.792	16.25	55 47.5	16 15	BB	0
2017	6	R/V Baltica	10	55.625	16.25	55 37.5	16 15	BB	0
2017	6	R/V Baltica	11	55.792	16.5	55 47.5	16 30	BB	0
2017	6	R/V Baltica	12	55.625	16.5	55 37.5	16 30	BB	0
2017	6	R/V Baltica	13	55.458	16.5	55 27.5	16 30	BB	0
2017	6	R/V Baltica	14	55.458	16.25	55 27.5	16 15	BB	0
2017	6	R/V Baltica	15	55.458	16	55 27.5	16 00	BB	0
2017	6	R/V Baltica	16	55.458	15.75	55 27.5	15 45	BB	0
2017	6	R/V Baltica	17	55.458	15.5	55 27.5	15 30	BB	0
2017	6	R/V Baltica	18	55.458	15.25	55 27.5	15 15	BB	0
2017	6	R/V Baltica	19	55.458	15	55 27.5	15 00	BB	0
2017	6	R/V Baltica	20	55.292	15	55 17.5	15 00	BB	0
2017	6	R/V Baltica	21	55.292	15.283	55 17.5	15 17	BB	0
2017	6	R/V Baltica	22	55.292	15.5	55 17.5	15 30	BB	0
2017	6	R/V Baltica	23	55.292	15.75	55 17.5	15 45	BB	0
2017	6	R/V Baltica	24	55.292	16	55 17.5	16 00	BB	0
2017	6	R/V Baltica	25	55.292	16.25	55 17.5	16 15	BB	0
2017	6	R/V Baltica	26	55.292	16.5	55 17.5	16 30	BB	0
2017	6	R/V Baltica	27	55.125	16.5	55 07.5	16 30	BB	0
2017	6	R/V Baltica	28	55.125	16.25	55 07.5	16 15	BB	0
2017	6	R/V Baltica	29	55.125	16	55 07.5	16 00	BB	0
2017	6	R/V Baltica	30	55.125	15.75	55 07.5	15 45	BB	0
2017	6	R/V Baltica	31	55.125	15.5	55 07.5	15 30	BB	0
2017	6	R/V Baltica	32	55.125	15.25	55 07.5	15 15	BB	0
2017	6	R/V Baltica	33	54.958	15.25	54 57.5	15 15	BB	0
2017	6	R/V Baltica	34	54.958	15.5	54 57.5	15 30	BB	0
2017	6	R/V Baltica	35	54.958	15.75	54 57.5	15 45	BB	0
2017	6	R/V Baltica	36	54.958	16	54 57.5	16 00	BB	0
2017	6	R/V Baltica	37	54.958	16.25	54 57.5	16 15	BB	0
2017	6	R/V Baltica	38	54.792	16	54 47.5	16 00	BB	0
2017	6	R/V Baltica	39	54.792	15.75	54 47.5	15 45	BB	0
2017	6	R/V Baltica	40	54.792	15.5	54 47.5	15 30	BB	0
2017	6	R/V Baltica	41	54.792	15.25	54 47.5	15 15	BB	0
2017	6	R/V Baltica	42	54.792	15	54 47.5	15 00	BB	0
2017	6	R/V Baltica	43	54.625	15.25	54 37.5	15 15	BB	0
2017	6	R/V Baltica	44	54.625	15.5	54 37.5	15 30	BB	0
2017	6	R/V Baltica	45	54.625	15.75	54 37.5	15 45	BB	0
2017	8	R/V Alkor	SW4	54.4689	10.3643	54 28.13	10 21.858	SW	0
2017	8	R/V Alkor	KB03	54.6915	10.1547	54 41.50	10 10.00	KB	0
2017	8	R/V Alkor	KB12	54.6833	10.4977	54 41.00	10 30.00	KB	0
2017	8	R/V Alkor	SW14	54.6583	10.7667	54 39.50	10 46.00	SW	0
2017	8	R/V Alkor	BY2	54.9695	14.1002	54 58.17	14 06.01	AB	0
2017	8	R/V Alkor	H14	55.075	14.35	55 04.5	14 21.0	AB	0
2017	8	R/V Alkor	BY5	55.2443	15.9903	55 14.66	15 59.42	BB	0
2017	8	R/V Alkor	GD56	55.15	18.4167	55 09	18 25	GD	0
2017	8	R/V Alkor	GD57	55.1667	18.8167	55 10	18 49	GD	0
2017	8	R/V Alkor	GD59a	55	18.6833	55 00	18 41	GD	0
2017	8	R/V Alkor	GD58	55	19.0833	55 00	19 05	GD	0
2017	8	R/V Alkor	GD59	54.9	18.9	54 54	18 54	GD	0
2017	8	R/V Alkor	GD63	54.9	19.2	54 54	19 12	GD	0
2017	8	R/V Alkor	GD60	54.8167	19.1333	54 49	19 08	GD	0
2017	8	R/V Alkor	GD60a	54.7167	19.2833	54 43	19 17	GD	0
2017	8	R/V Alkor	01	55.458	14.75	55 27.5	14 45	BB	0
2017	8	R/V Alkor	02	55.625	14.75	55 37.5	14 45	BB	0
2017	8	R/V Alkor	03	55.625	15	55 37.5	15 00	BB	0
2017	8	R/V Alkor	04	55.625	15.25	55 37.5	15 15	BB	0
2017	8	R/V Alkor	05	55.625	15.5	55 37.5	15 30	BB	0
2017	8	R/V Alkor	06	55.625	15.75	55 37.5	15 45	BB	0
2017	8	R/V Alkor	07	55.625	16	55 37.5	16 00	BB	0
2017	8	R/V Alkor	08	55.792	16	55 47.5	16 00	BB	0
2017	8	R/V Alkor	09	55.792	16.25	55 47.5	16 15	BB	0
2017	8	R/V Alkor	10	55.625	16.25	55 37.5	16 15	BB	0
2017	8	R/V Alkor	11	55.792	16.5	55 47.5	16 30	BB	0
2017	8	R/V Alkor	12	55.625	16.5	55 37.5	16 30	BB	0
2017	8	R/V Alkor	13	55.458	16.5	55 27.5	16 30	BB	0
2017	8	R/V Alkor	14	55.458	16.25	55 27.5	16 15	BB	0
2017	8	R/V Alkor	15	55.458	16	55 27.5	16 00	BB	0
2017	8	R/V Alkor	16	55.458	15.75	55 27.5	15 45	BB	0
2017	8	R/V Alkor	17	55.458	15.5	55 27.5	15 30	BB	0
2017	8	R/V Alkor	18	55.458	15.25	55 27.5	15 15	BB	0
2017	8	R/V Alkor	19	55.458	15	55 27.5	15 00	BB	0
2017	8	R/V Alkor	20	55.292	15	55 17.5	15 00	BB	0
2017	8	R/V Alkor	21	55.292	15.283	55 17.5	15 17	BB	0
2017	8	R/V Alkor	22	55.292	15.5	55 17.5	15 30	BB	0
2017	8	R/V Alkor	23	55.292	15.75	55 17.5	15 45	BB	0
2017	8	R/V Alkor	24	55.292	16	55 17.5	16 00	BB	0
2017	8	R/V Alkor	25	55.292	16.25	55 17.5	16 15	BB	0
2017	8	R/V Alkor	26	55.292	16.5	55 17.5	16 30	BB	0
2017	8	R/V Alkor	27	55.125	16.5	55 07.5	16 30	BB	0
2017	8	R/V Alkor	28	55.125	16.25	55 07.5	16 15	BB	0
2017	8	R/V Alkor	29	55.125	16	55 07.5	16 00	BB	0
2017	8	R/V Alkor	30	55.125	15.75	55 07.5	15 45	BB	0
2017	8	R/V Alkor	31	55.125	15.5	55 07.5	15 30	BB	0
2017	8	R/V Alkor	32	55.125	15.25	55 07.5	15 15	BB	0
2017	8	R/V Alkor	33	54.958	15.25	54 57.5	15 15	BB	0
2017	8	R/V Alkor	34	54.958	15.5	54 57.5	15 30	BB	0
2017	8	R/V Alkor	35	54.958	15.75	54 57.5	15 45	BB	0
2017	8	R/V Alkor	36	54.958	16	54 57.5	16 00	BB	0
2017	8	R/V Alkor	37	54.958	16.25	54 57.5	16 15	BB	0
2017	8	R/V Alkor	38	54.792	16	54 47.5	16 00	BB	0
2017	8	R/V Alkor	39	54.792	15.75	54 47.5	15 45	BB	0
2017	8	R/V Alkor	40	54.792	15.5	54 47.5	15 30	BB	0
2017	8	R/V Alkor	41	54.792	15.25	54 47.5	15 15	BB	0
2017	8	R/V Alkor	42	54.792	15	54 47.5	15 00	BB	0
2017	8	R/V Alkor	43	54.625	15.25	54 37.5	15 15	BB	0
2017	8	R/V Alkor	44	54.625	15.5	54 37.5	15 30	BB	0
2017	8	R/V Alkor	45	54.625	15.75	54 37.5	15 45	BB	0
2017	8	R/V Alkor	30	55.125	15.75	55 07.5	15 45	BB	0
2017	8	R/V Alkor	BY1	55.0363	13.317	55 02.18	13 19.02	AB	0
2017	8	R/V Alkor	BY2	54.9695	14.1002	54 58.17	14 06.01	AB	0
2017	8	R/V Alkor	T4	57.531	17.4595	57 31.86	17 27.57	WGB	0
2017	8	R/V Alkor	T5	57.0709	17.3135	57 04.26	17 18.81	WGB	0
2017	8	R/V Alkor	T6	56.65	17.2	56 39.00	17 12.00	WGB	0
2017	8	R/V Alkor	T7	56.3	16.9782	56 18.00	16 58.69	WGB	0
2017	8	R/V Alkor	T8	55.9743	16.719	55 58.46	16 43.14	BB	0
2017	8	R/V Alkor	BY32	58.0195	17.9778	58 01.17	17 58.67	WGB	0
2017	8	R/V Alkor	BY20A	58	19.9	58 00.00	19 54.00	GB	0
2017	8	R/V Alkor	BY15	57.3352	19.941	57 20.11	19 56.46	GB	0
2017	8	R/V Alkor	GB96	56.9167	19.5833	56 55	19 35	GB	0
2017	8	R/V Alkor	N1	54.3055	14.188	54 18.33	14 11.28	AB	0
2017	8	R/V Alkor	N2	54.7154	13.9696	54 42.92	13 58.18	AB	0
2017	8	R/V Alkor	H18	54.9417	13.7833	54 56.5	13 47.0	AB	0
