# Supplementary material for: First record of the non-indigenous jellyfish Blackfordia virginica (Mayer, 1910) in the Baltic Sea
Source: Springer Nature journal article supplement (doi:10.1186/s10152-018-0513-7), 2018-08-01
Supplement: MOESM2 [file 10152_2018_513_MOESM2_ESM.docx]

**Table S2** *Blackfordia virginica* medusae (Mayer, 1910) recordings at the monitoring station in the Kiel Canal with abundance, temperature and salinity measurements (±SD) for the respective sampling points.

| **Year** | **Month** | **Date** | **Av abundance (ind m-3)** | **SD** | **Av salinity** | **SD** | **Av temperature (°C)** | **SD** |
| --- | --- | --- | --- | --- | --- | --- | --- | --- |
| 2010 |  | entire year | 0 |  | n.a. | n.a. | n.a. | n.a. |
| 2011 |  | entire year | 0 |  | n.a. | n.a. | n.a. | n.a. |
| 2012 |  | entire year | 0 |  | n.a. | n.a. | n.a. | n.a. |
| 2013 |  | entire year | 0 |  | n.a. | n.a. | n.a. | n.a. |
| 2014 | June | 11/06/2014 | 0 |  | 10.48 | 0.34 | 18.42 | 0.30 |
|  | August | 12/08/2014 | 0 |  | 12.33 | 0.02 | 21.97 | 0.08 |
|  | September | 16/09/2014 | 0 |  | 13.94 | 0.69 | 17.90 | 0.26 |
|  | October | 14/10/2014 | 0.71 |  | 13.07 | 0.41 | 15.38 | 0.05 |
| 2015 | March | 17/03/2015 | 0 |  | 10.85 | 0.63 | 5.42 | 0.25 |
|  | April | 30/04/2015 | 0 |  | 9.72 | 0.51 | 10.72 | 0.13 |
|  | Mai | 07/05/2015 | 0 |  | 9.96 | 0.07 | 11.89 | 0.01 |
|  | Mai | 27/05/2015 | 0 |  | 10.91 | 0.59 | 13.09 | 0.10 |
|  | June | 14/06/2015 | 0 |  | 11.71 | 0.09 | 16.05 | 0.06 |
|  | July | 01/07/2015 | 0 |  | 11.19 | 0.34 | 18.01 | 0.33 |
|  | July | 16/07/2015 | present |  | 11.52 | 0.08 | 19.03 | 0.04 |
|  | August | 25/08/2015 | 0 |  | 11.31 | 0.29 | 19.75 | 0.04 |
|  | October | 15/10/2015 | 0 |  | 10.95 | 0.31 | 13.18 | 0.18 |
|  | November | 12/11/2015 | 0 |  | 8.93 | 0.21 | 11.55 | 0.10 |
| 2016 | February | 17/02/2016 | 0 |  | 9.33 | 1.99 | 3.88 | 0.19 |
|  | March | 16/03/2016 | 0 |  | 10.87 | 1.06 | 4.67 | 0.76 |
|  | April | 06/04/2016 | 0 |  | 10.60 | 0.74 | 7.28 | 0.17 |
|  | April | 13/04/2016 | 0 |  | 10.05 | 1.12 | 8.22 | 0.34 |
|  | April | 20/04/2016 | 1.27 |  | 9.68 | 0.35 | 8.71 | 0.35 |
|  | May | 04/05/2016 | 0 |  | 9.94 | 0.44 | 9.75 | 0.30 |
|  | May | 11/05/2016 | 0 |  | 10.56 | 0.84 | 12.77 | 0.70 |
|  | May | 19/05/2016 | 0 |  | 10.42 | 0.24 | 13.41 | 0.48 |
|  | June | 08/06/2016 | 0 |  | 10.36 | 0.23 | 18.87 | 0.21 |
|  | June | 15/06/2016 | present |  | 10.13 | 0.16 | 18.73 | 0.06 |
|  | June | 22/06/2016 | present |  | 7.04 | 0.32 | 19.00 | 0.09 |
|  | July | 13/07/2016 | 5.07 |  | 9.97 | 0.36 | 18.38 | 0.14 |
|  | August | 17/08/2016 | 1.16 |  | 13.04 | 0.65 | 18.05 | 0.67 |
|  | October | 13/10/2016 | 1.27 |  | 12.86 | 0.12 | 14.17 | 0.44 |
|  | November | 16/11/2016 | 0 |  | 9.53 | 0.29 | 7.61 | 7.61 |
|  | December | 14/12/2016 | 0 |  | 10.47 | 0.61 | 6.40 | 0.13 |
| 2017 | May | 31/05/2017 | 0 |  | 10.51 | 0.04 | 17.04 | 0.02 |
|  | June | 28/06/2017 | 12.59 | 2.53 | 11.16 | 0.47 | 18.34 | 0.08 |
|  | July | 15/07/2017 | present |  | n.a. | n.a. | n.a. | n.a. |
|  | August | 15/08/2017 | present |  | n.a. | n.a. | n.a. | n.a. |
|  | September | 15/09/2017 | present |  | n.a. | n.a. | n.a. | n.a. |
|  | October | 11/10/2017 | 1.04 | 0.18 | 7.32 | 0.59 | 13.84 | 0.05 |
|  | November | 15/11/2017 | 0 |  | 10.01 | 0.36 | 9.46 | 0.08 |
